# Supplementary material for: Concise asymmetric synthesis of new enantiomericC-alkyl pyrrolidines acting as pharmacological chaperones against Gaucher disease
Source: Royal Society of Chemistry journal article supplement (doi:10.1039/d0ob01522a), 2020-01-01
Supplement: d0ob01522a1.pdf [file d0ob01522a1.pdf]

## Supporting information

### Concise asymmetric synthesis of new enantiomeric C-alkyl pyrrolidines acting as pharmacological chaperones against Gaucher disease

Tessa Castellán,<sup>a</sup> Virginie Garcia,<sup>b</sup> Frédéric Rodriguez,<sup>a</sup> Isabelle Fabing,<sup>a</sup> Yevhenii Shchukin,<sup>a</sup>  
My Lan Tran,<sup>a</sup> Stéphanie Ballereau,<sup>a</sup> Thierry Levade,<sup>b</sup> Yves Génisson,<sup>a</sup> Cécile Dehoux<sup>\*a</sup>

- |                                                                                                                        |               |
|------------------------------------------------------------------------------------------------------------------------|---------------|
| 1) <sup>1</sup> H and <sup>13</sup> C NMR spectra of new compounds                                                     | p. <b>S2</b>  |
| 2) NOESY NMR analyses of compounds <b>2</b> and <b>3</b> to determine the relative configuration of C1, C2, C3 carbons | p. <b>S14</b> |
| 3) Dose-response curves of compounds <b>2</b> and <i>ent-2</i> versus β-GCase                                          | p. <b>S15</b> |
| 4) Lineweaver-Burk plots for compounds <b>2</b> and <i>ent-2</i> versus β-GCase                                        | p. <b>S16</b> |
| 5) Comparison of NN-DNJ with best poses (P1-OPT docking protocol) of <i>ent-2</i> and <b>2</b> compounds               | p. <b>S17</b> |
| 6) MTT Test for compound <b>2</b> , <i>ent-2</i> , NN-DNJ, IFG at 30 μM                                                | p. <b>S18</b> |

# $^1\text{H}$ and $^{13}\text{C}$ NMR spectra of new compounds

## Compound 7

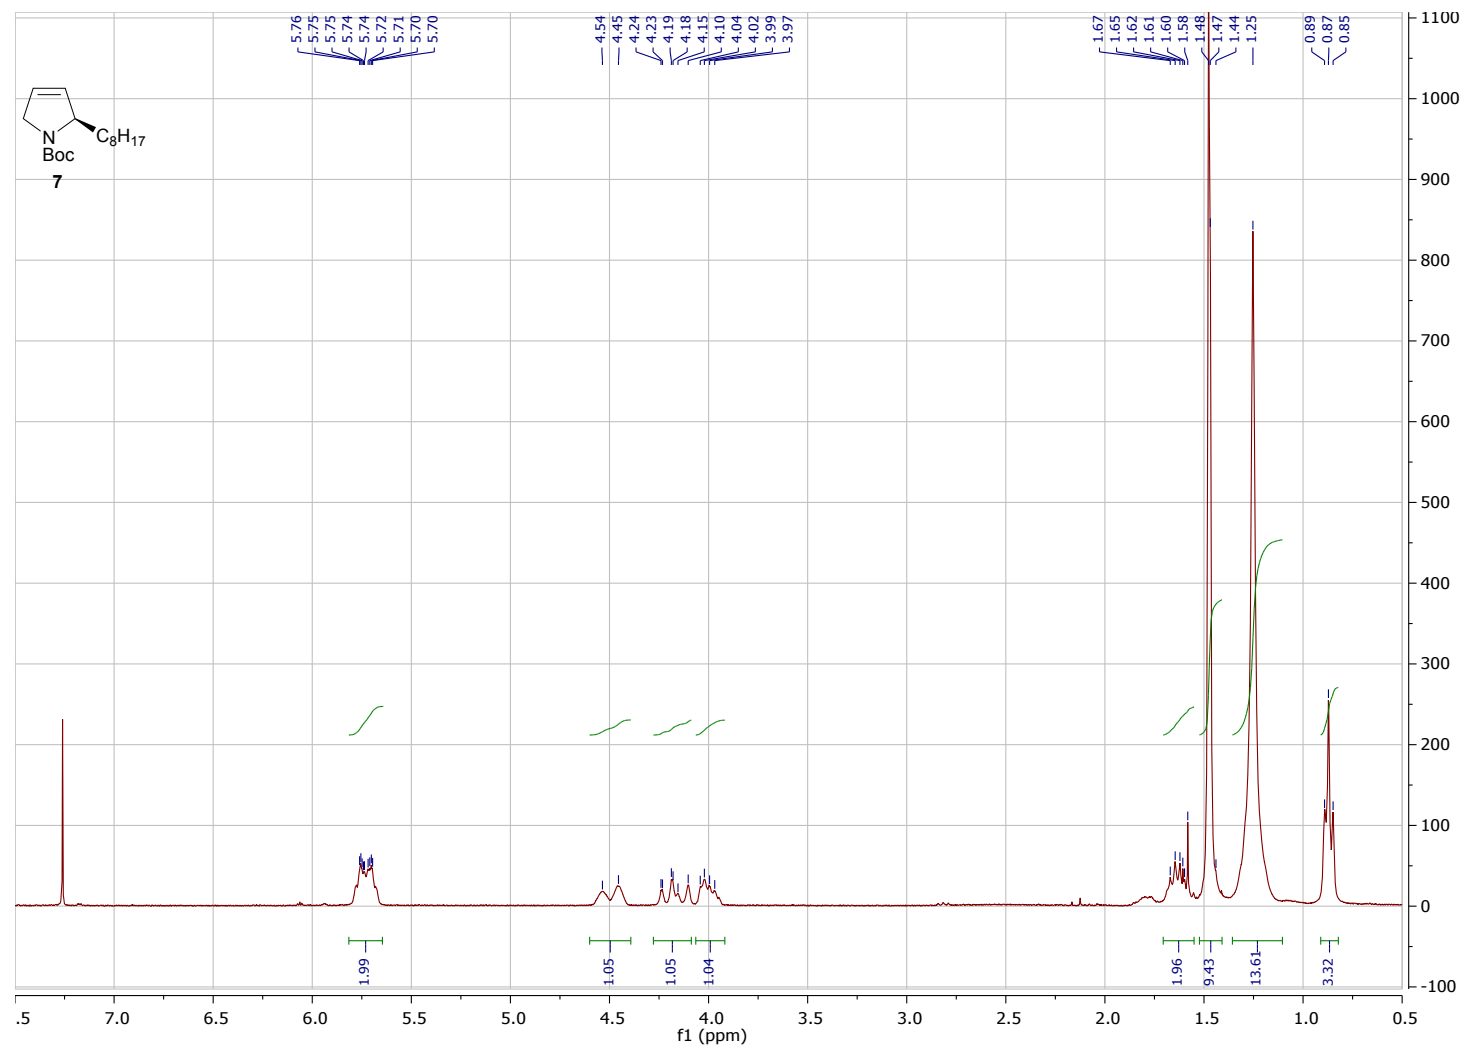

# Compound 7

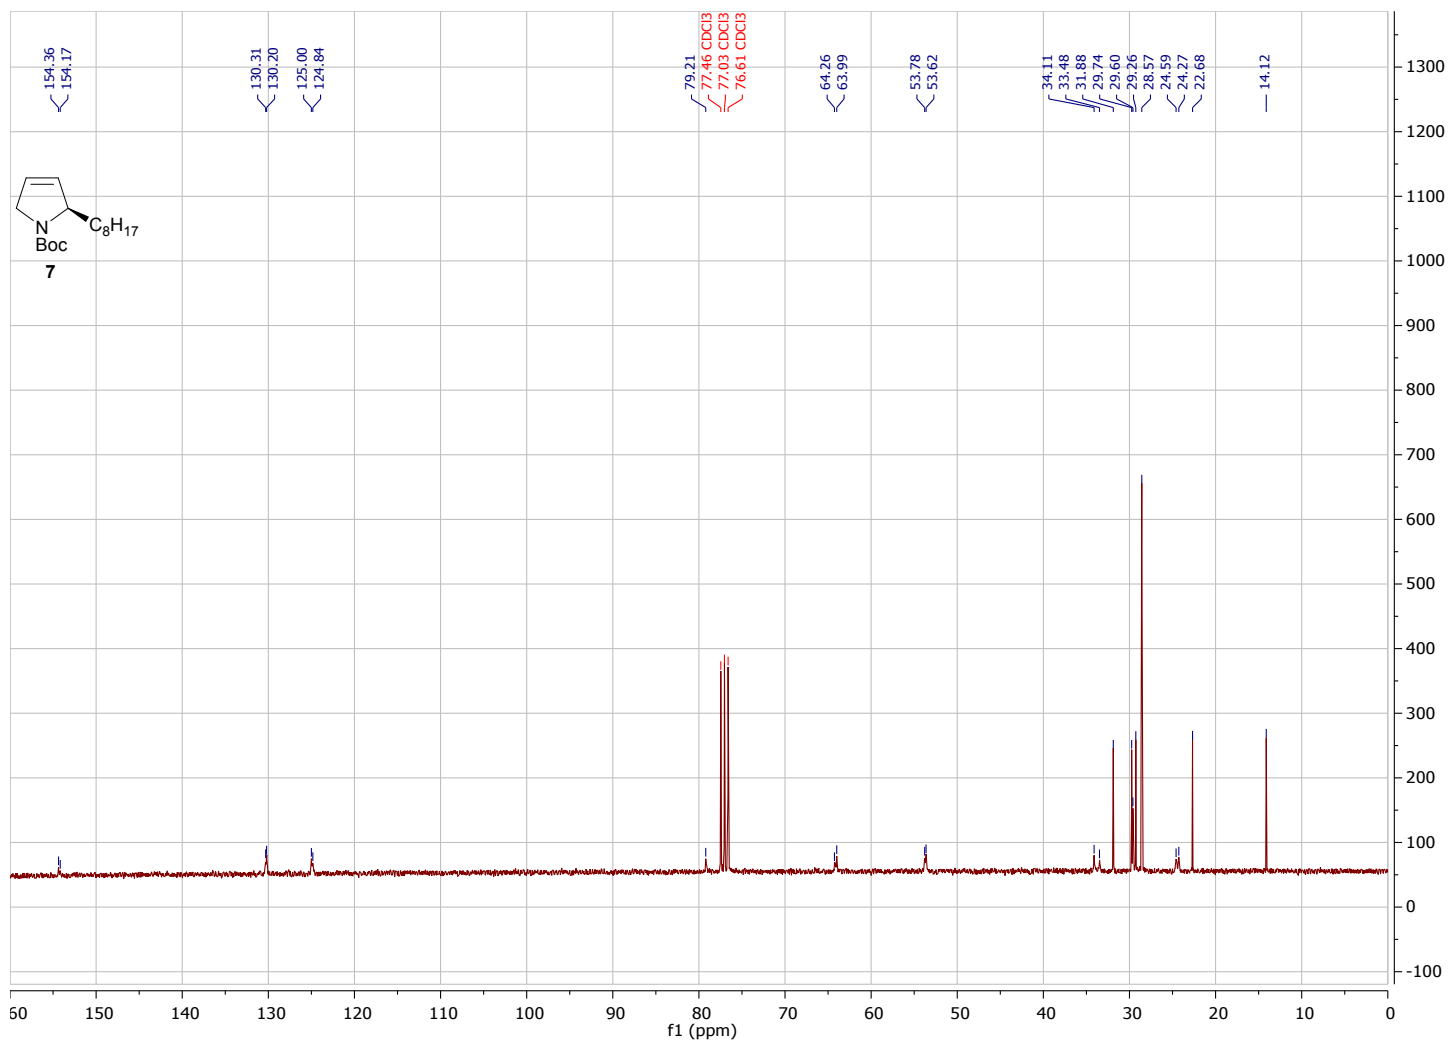

Compound *ent-7*

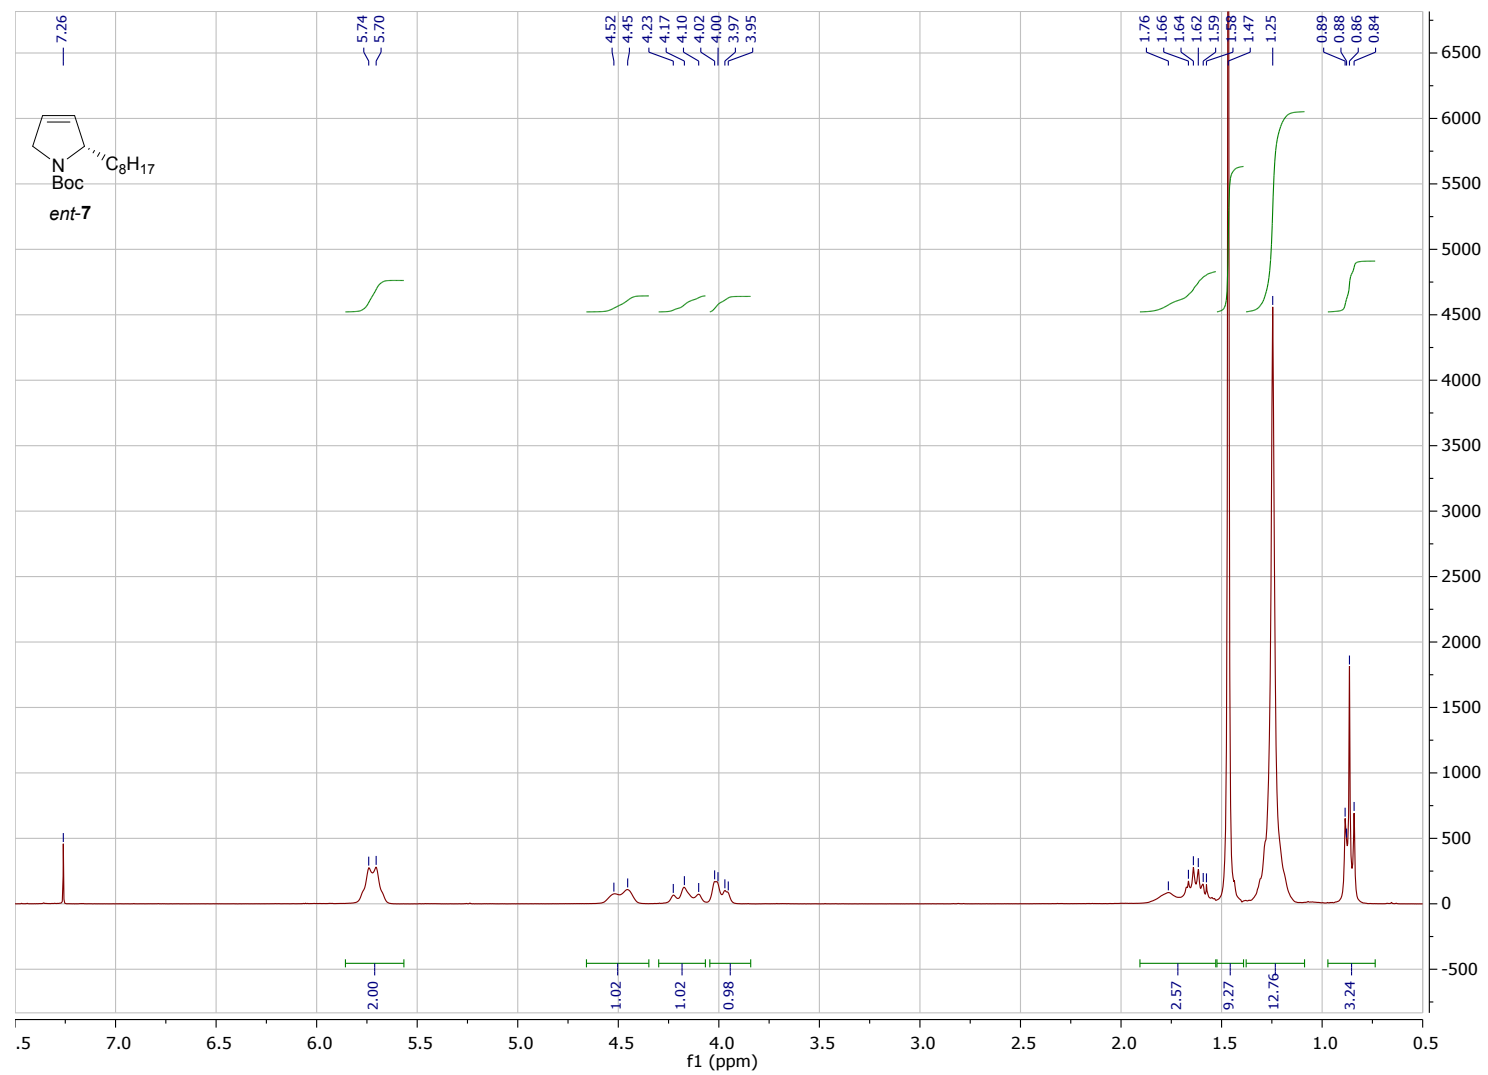

Compound *ent-7*

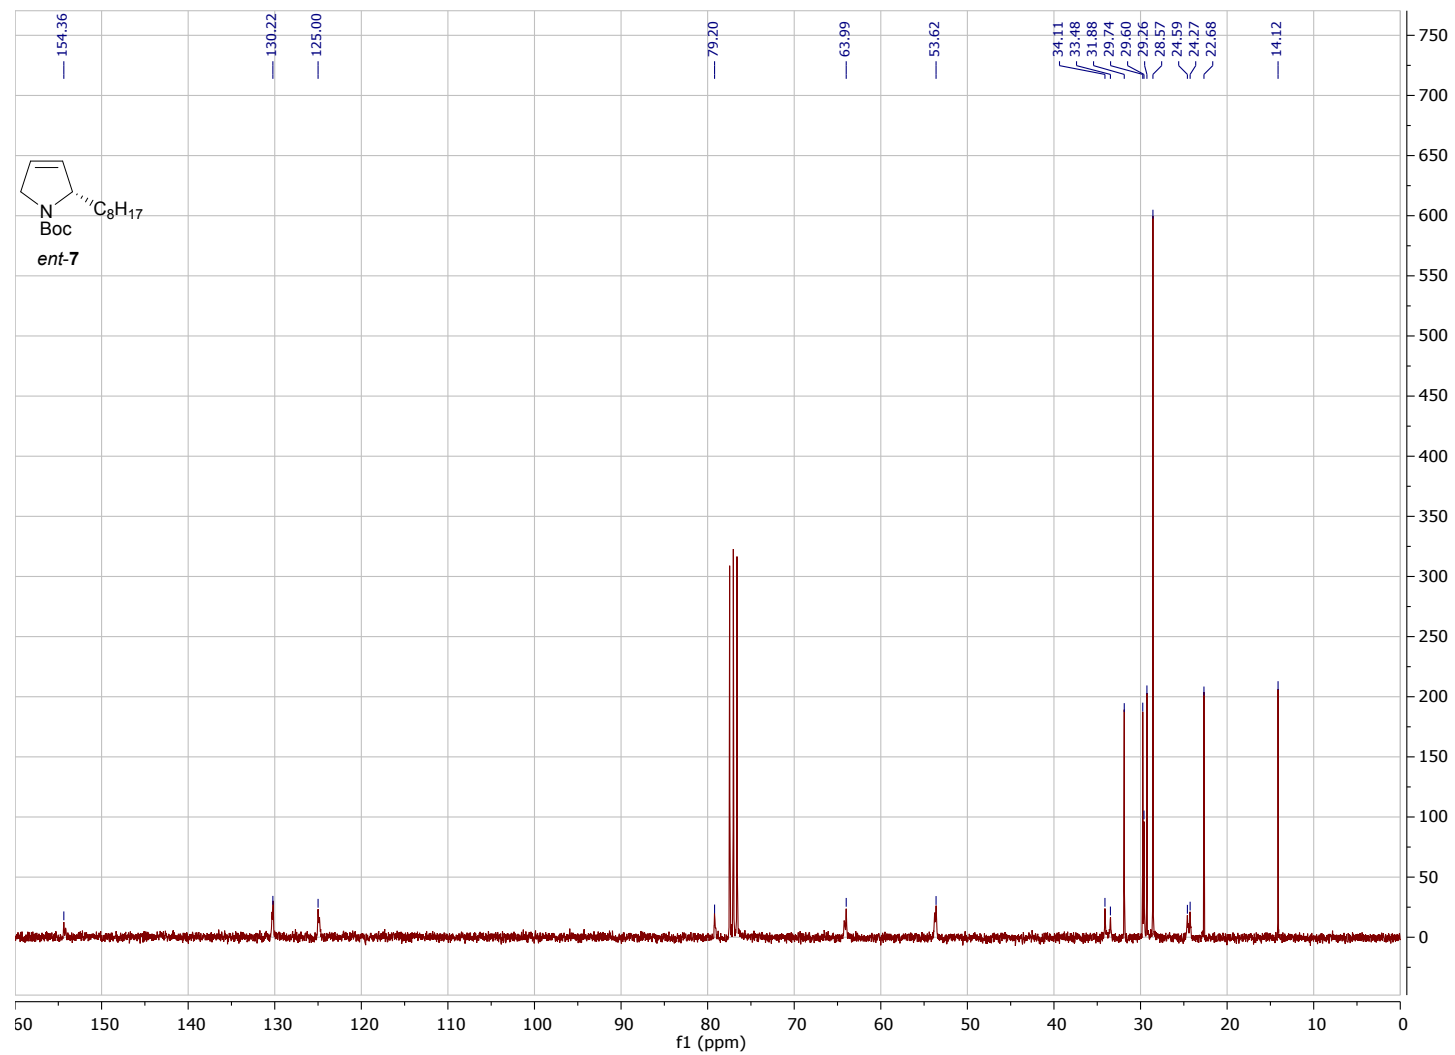

# Compound 8

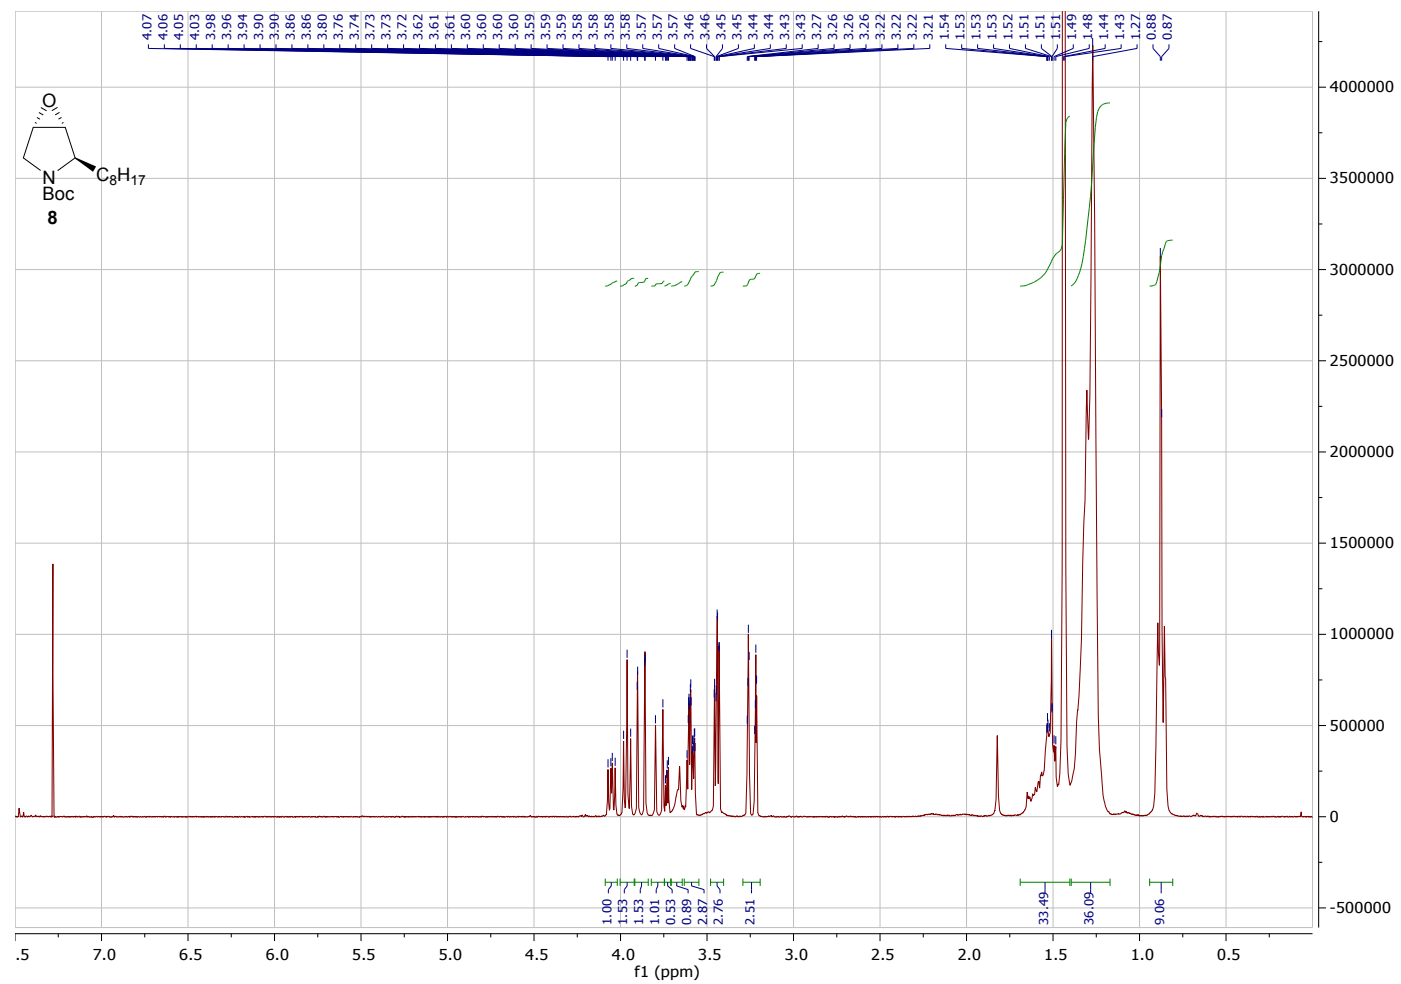

# Compound 8

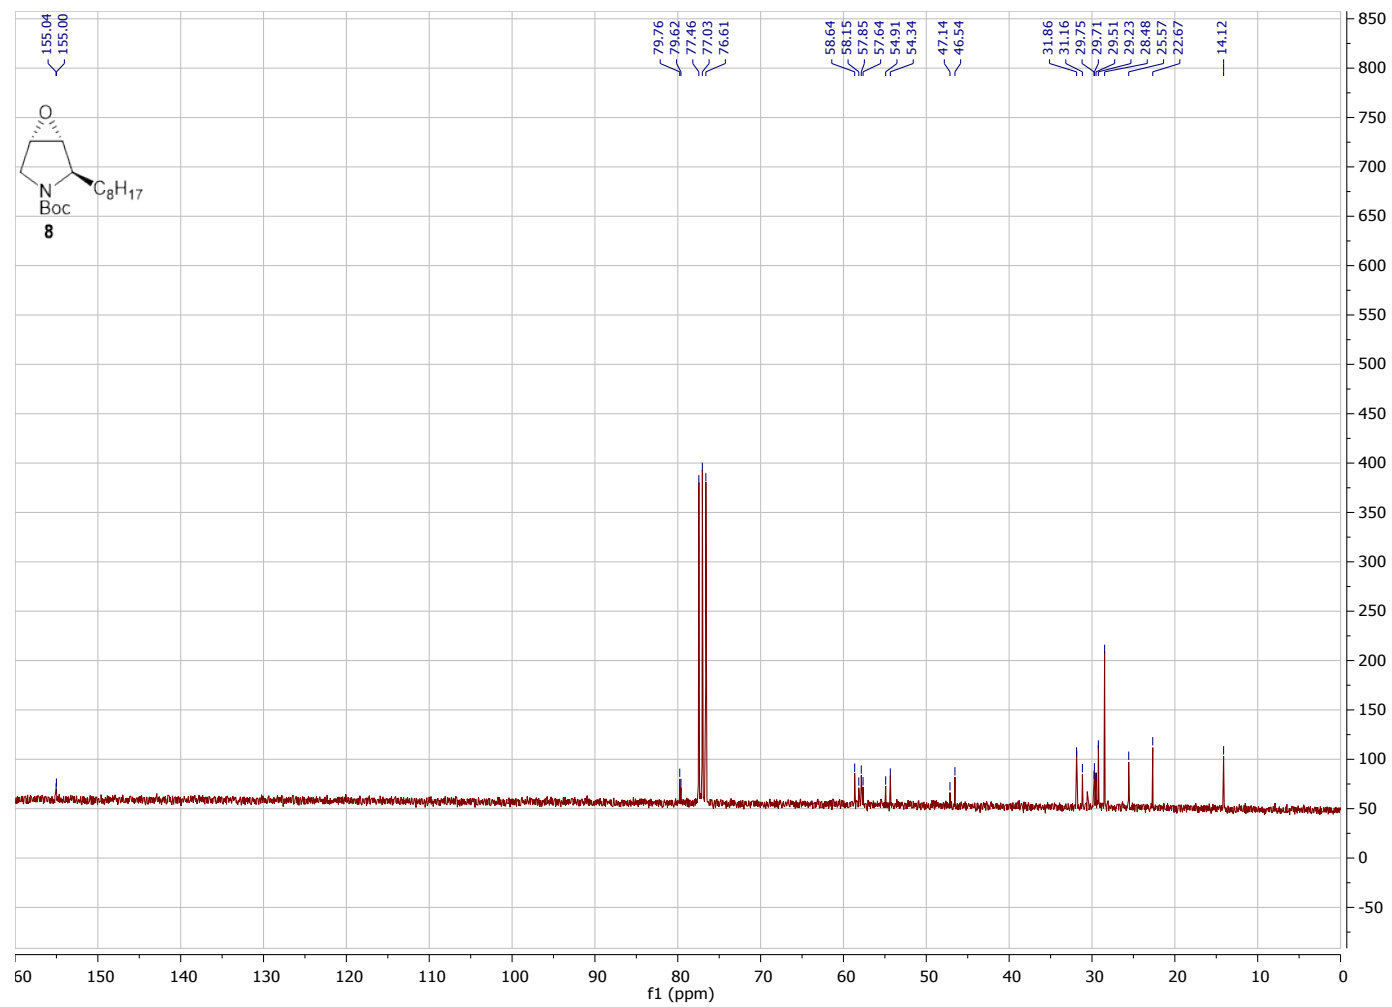

Compound *ent-8*

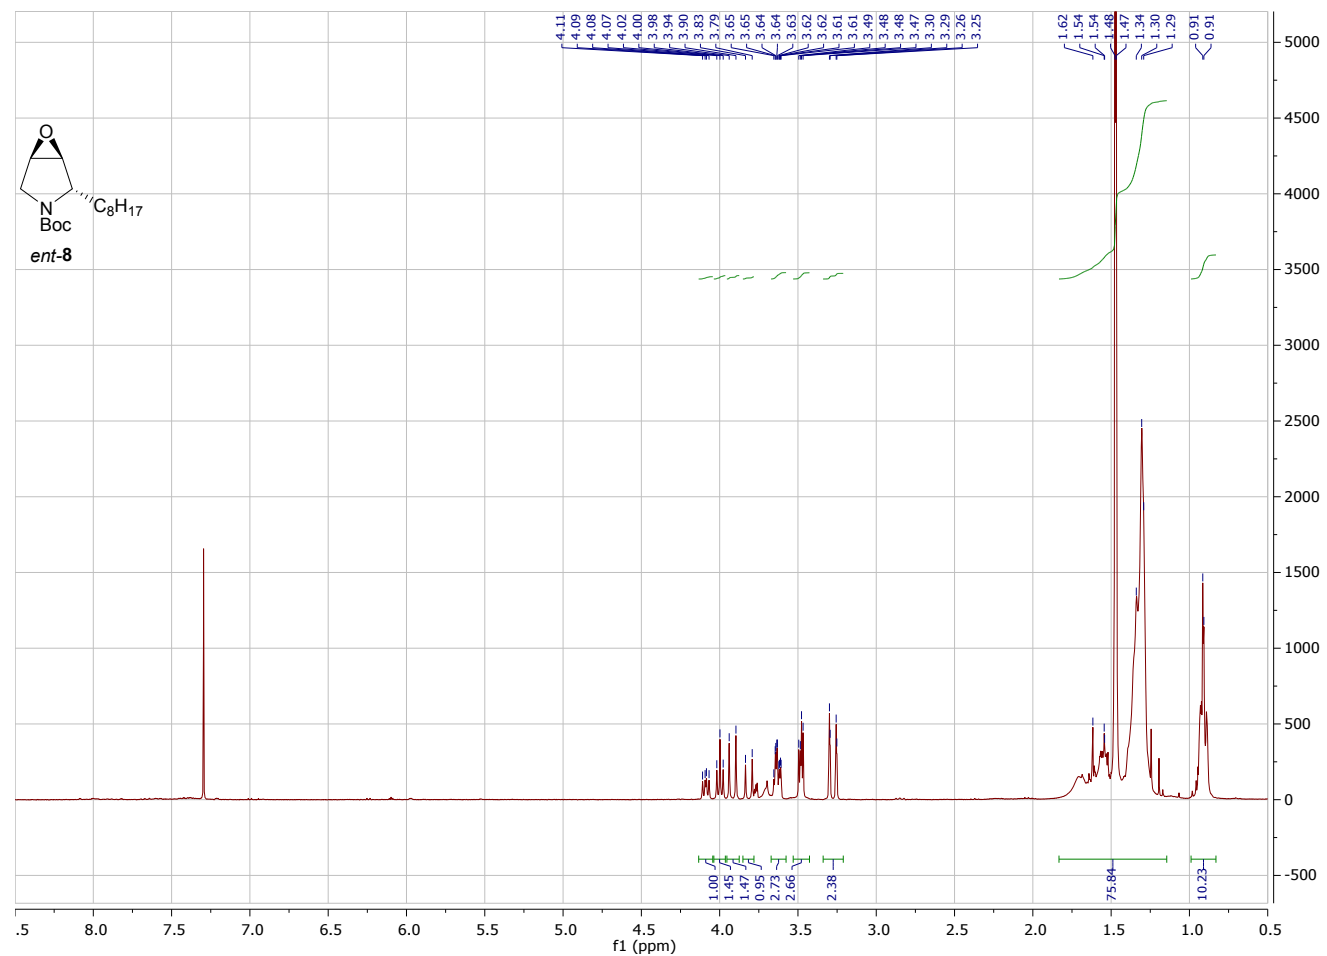



# Compound *ent-8*

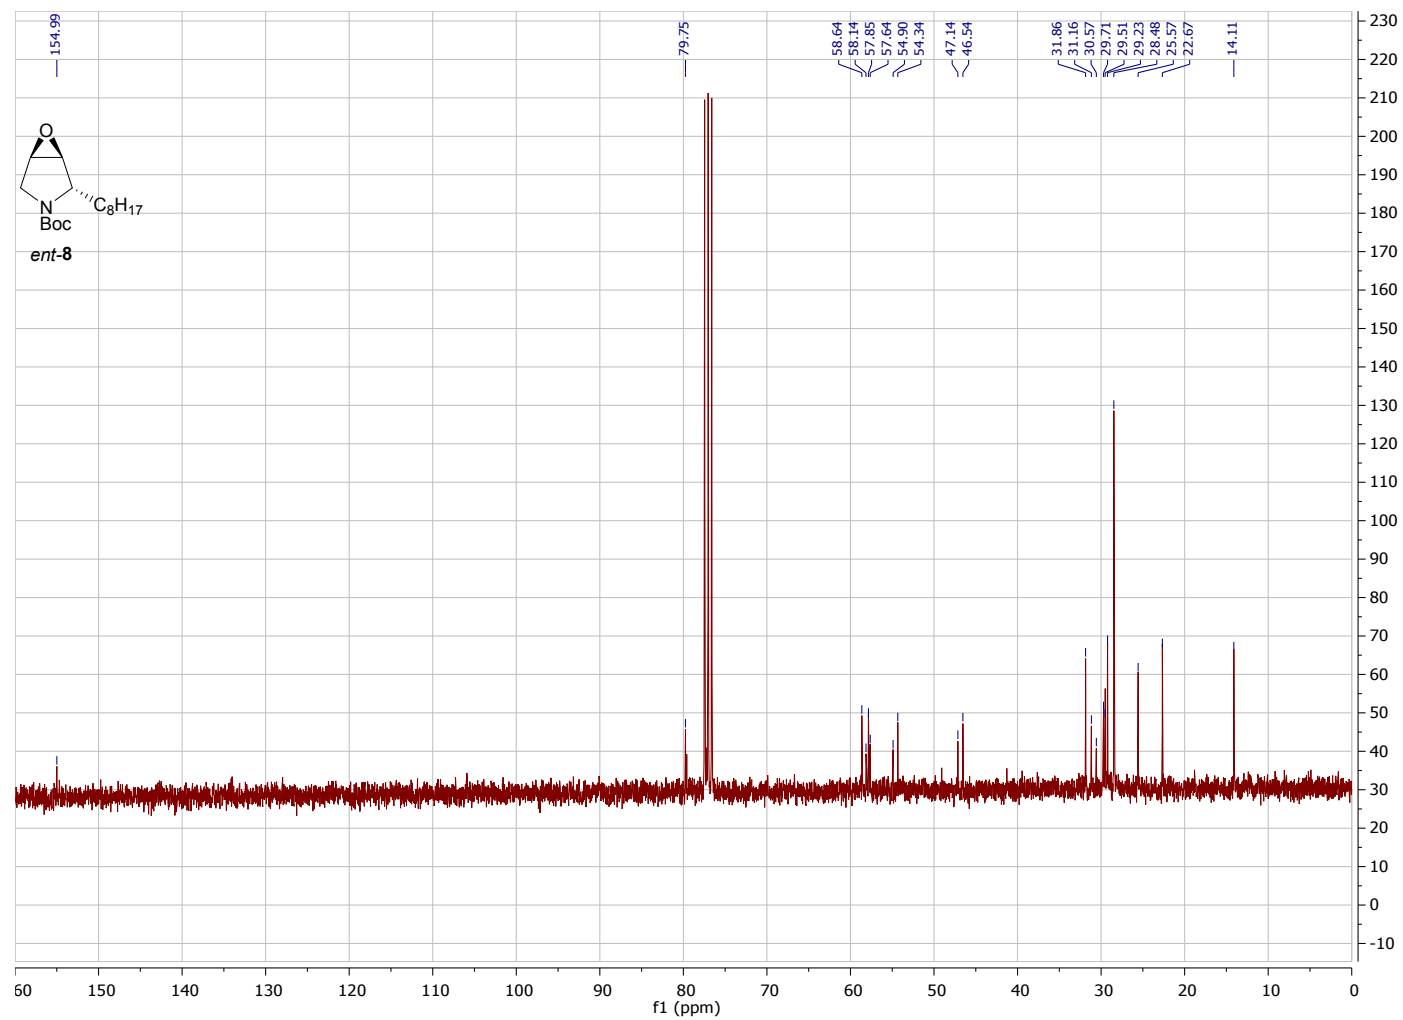

# Compound 2

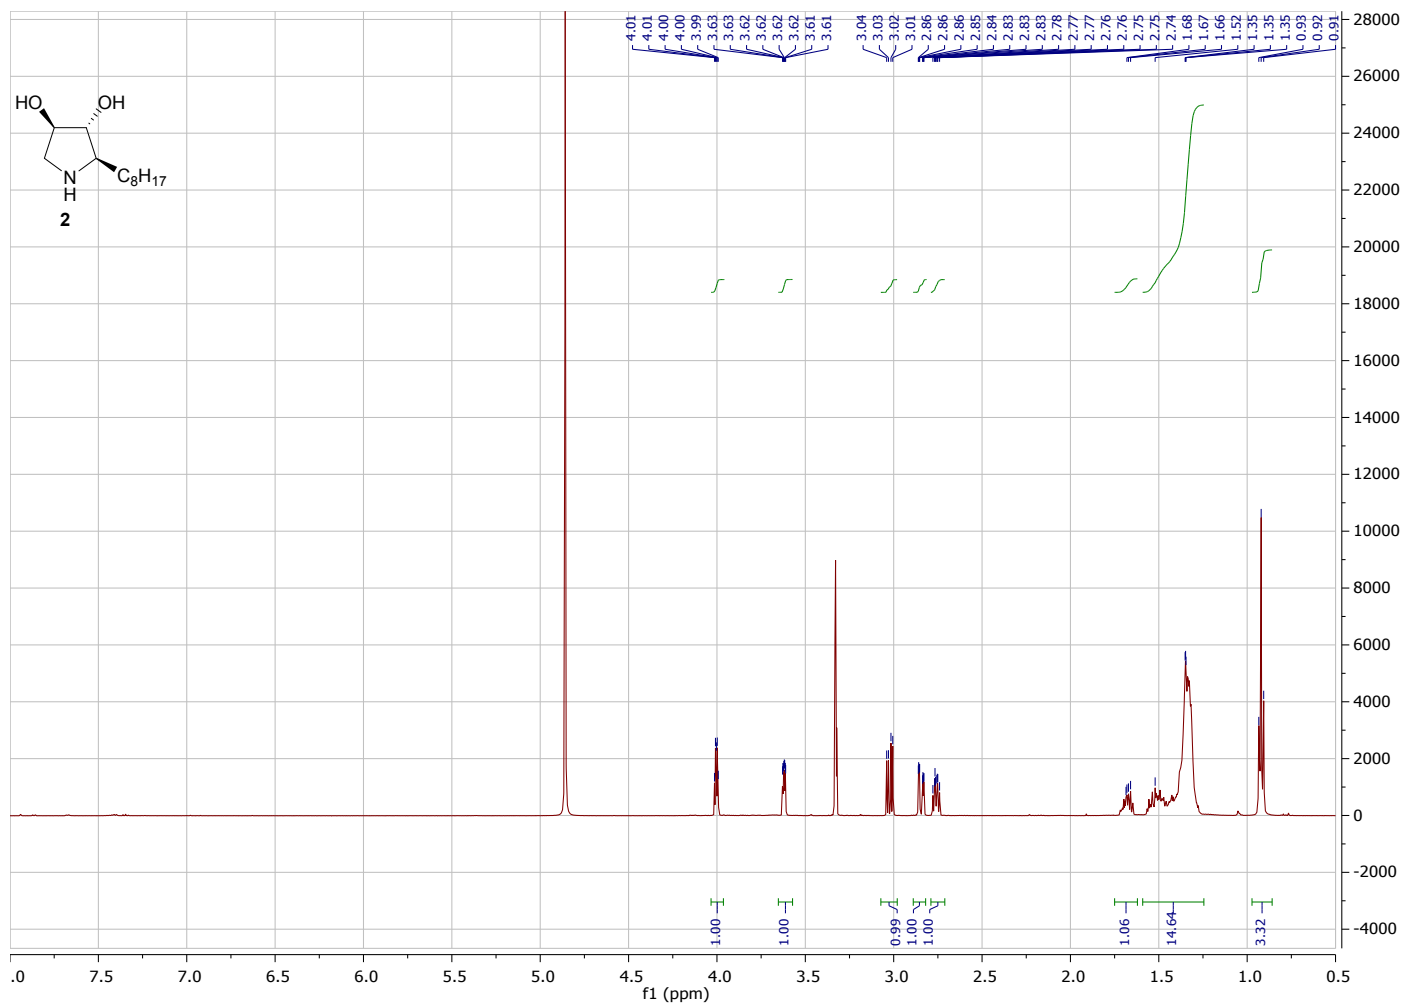

# Compound 2

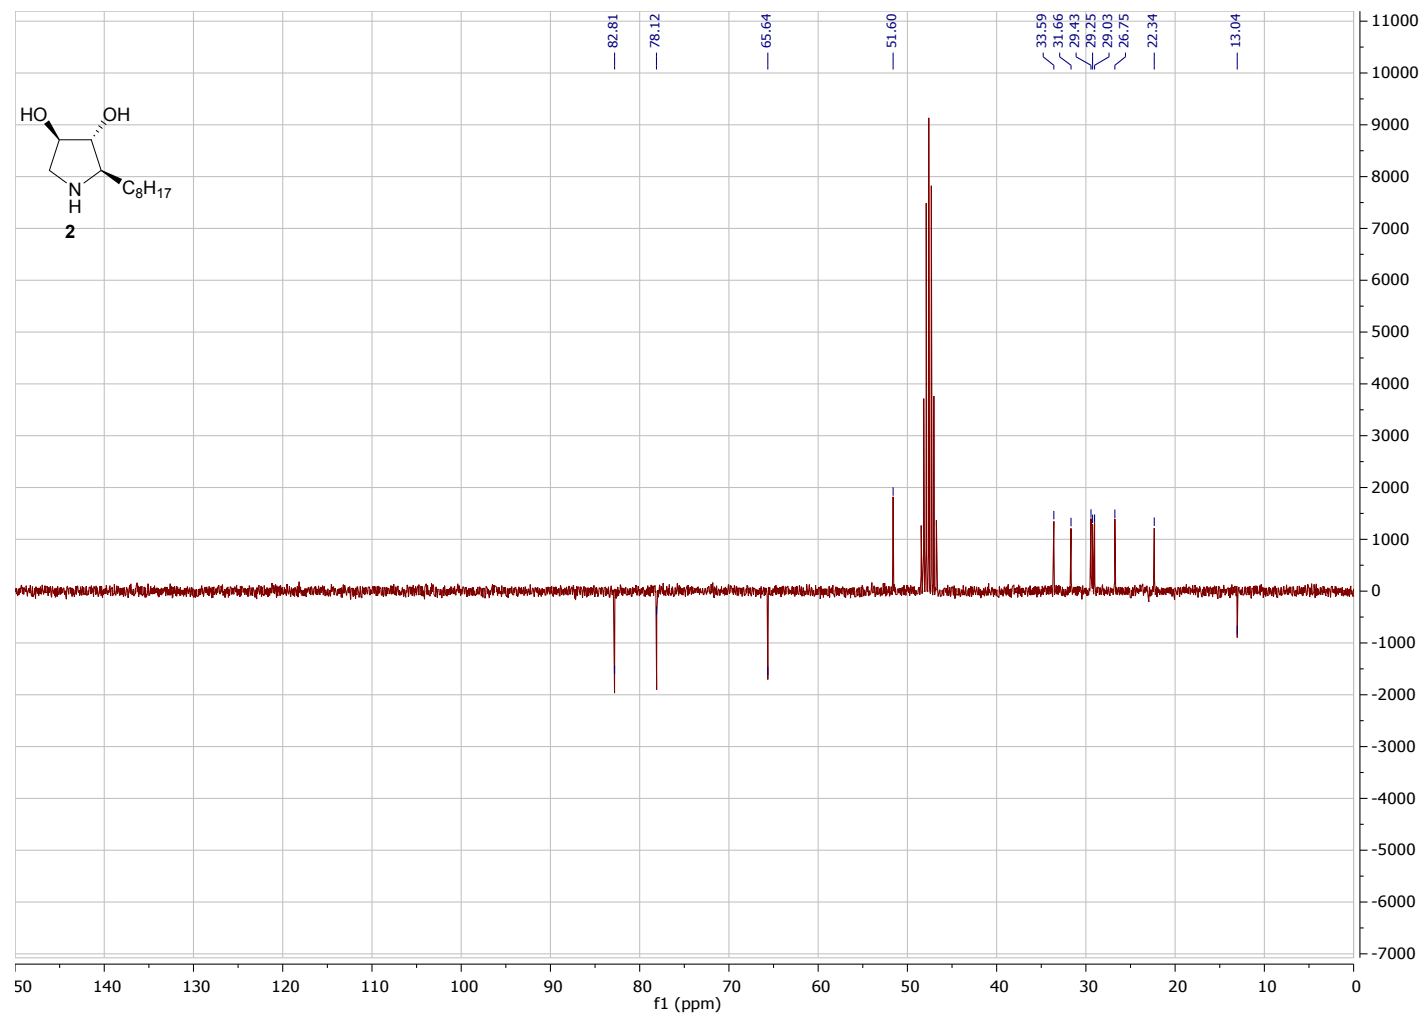

Compound *ent-2*

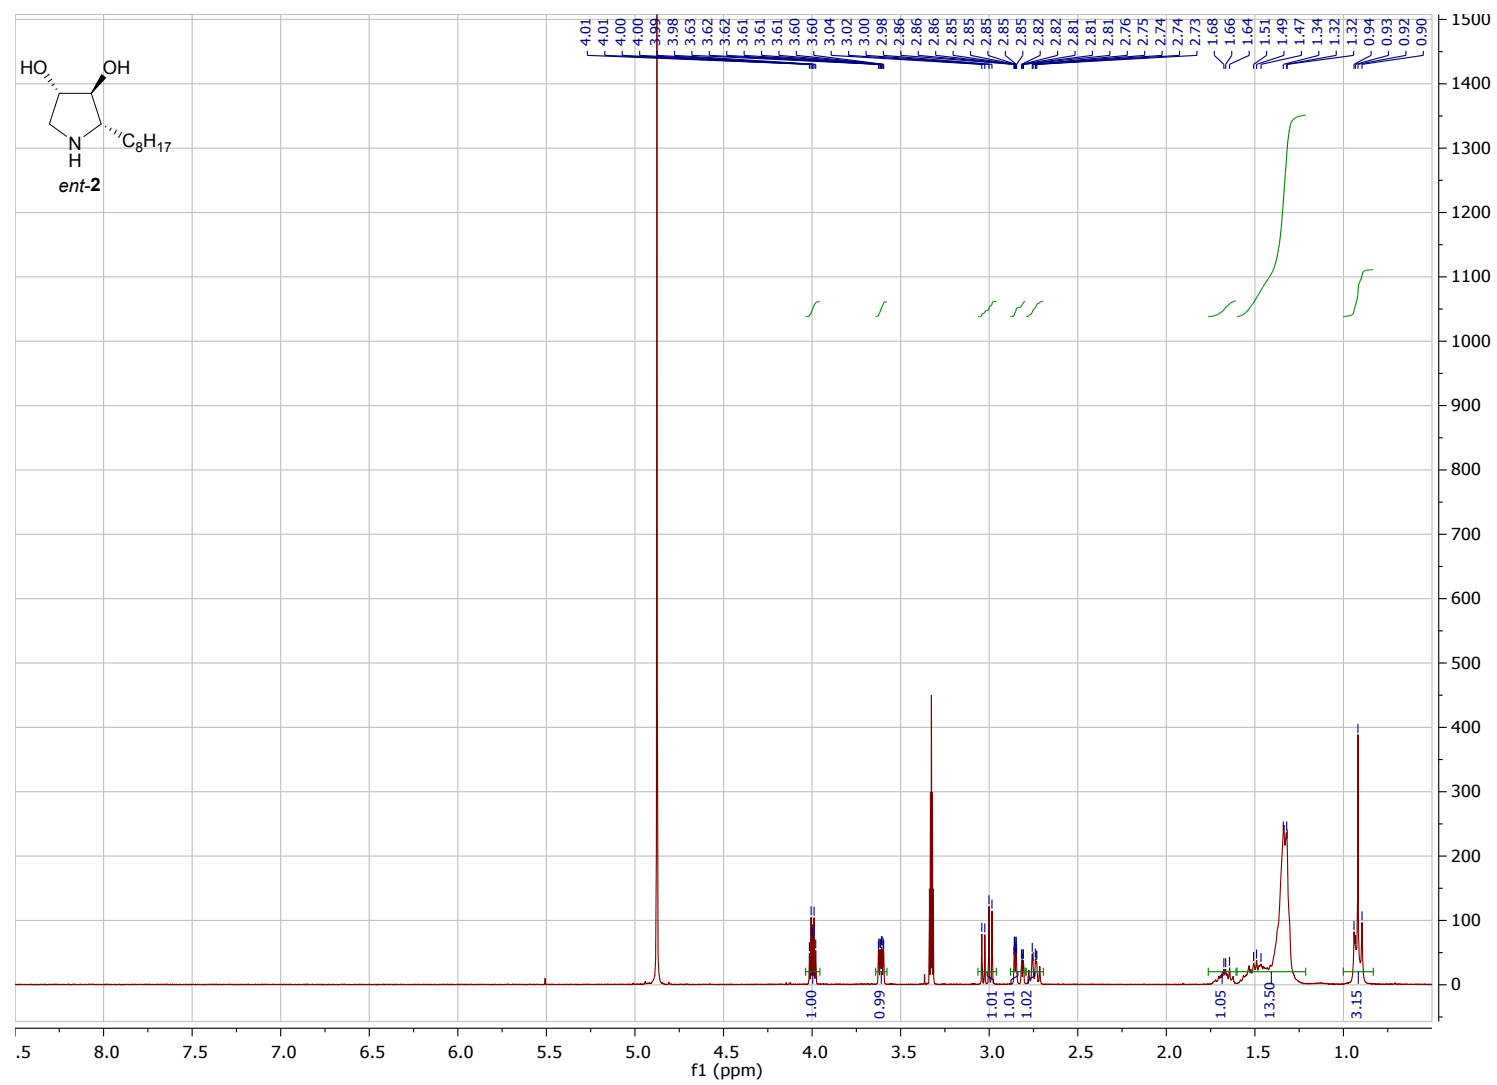

Compound *ent-2*

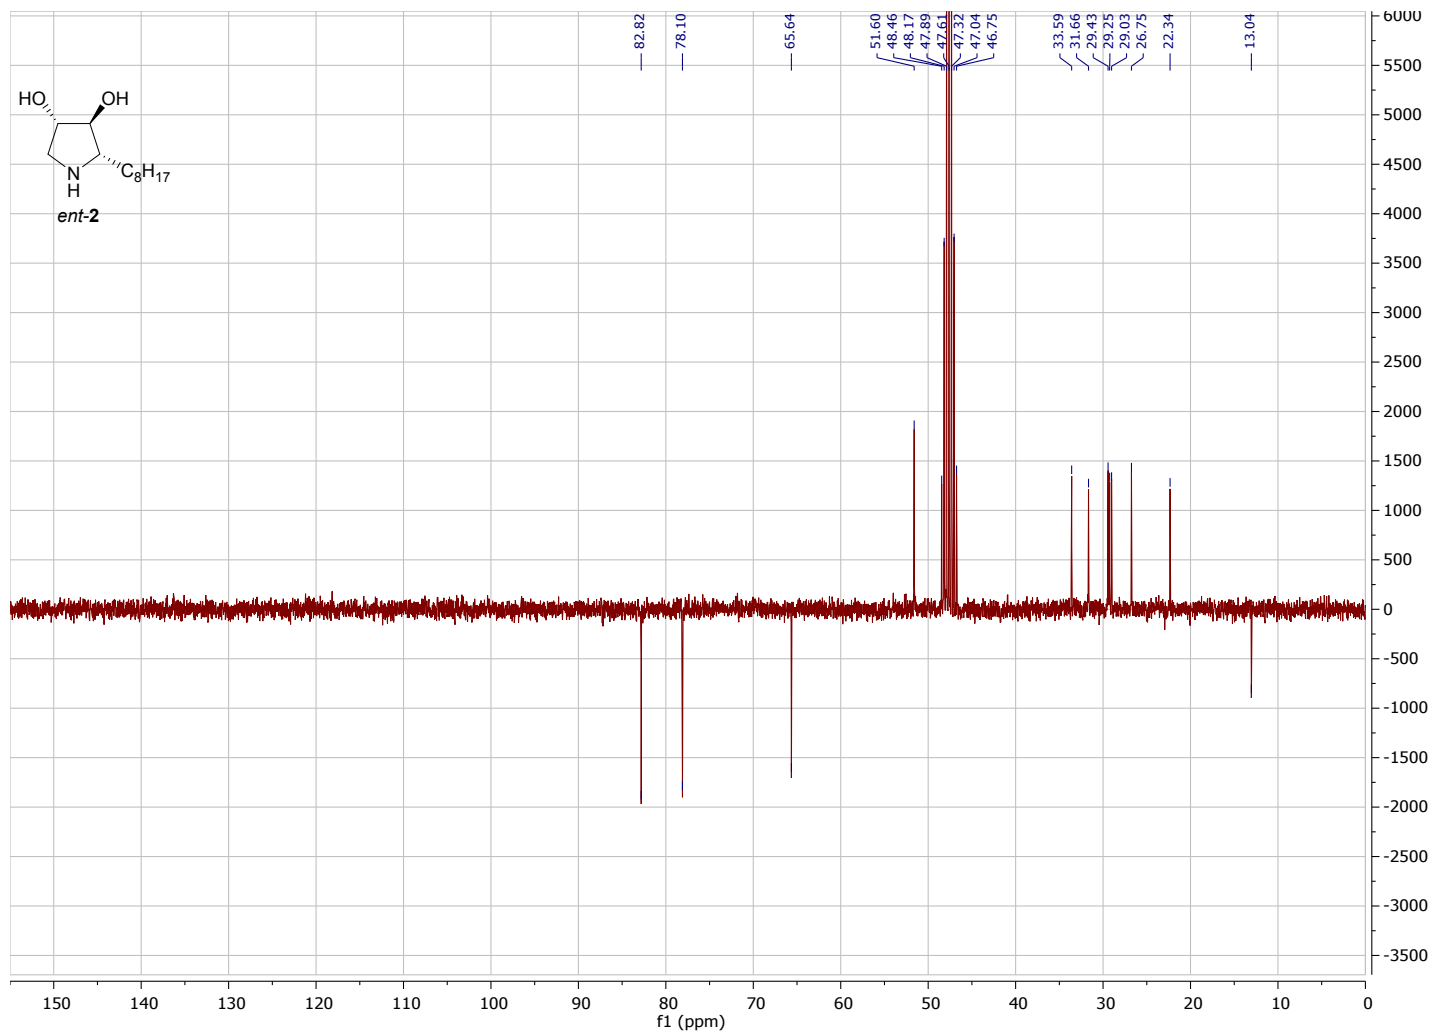

# NOESY NMR analyses of compounds 2 and 3 to determine relative configuration of C1, C2, C3 carbons

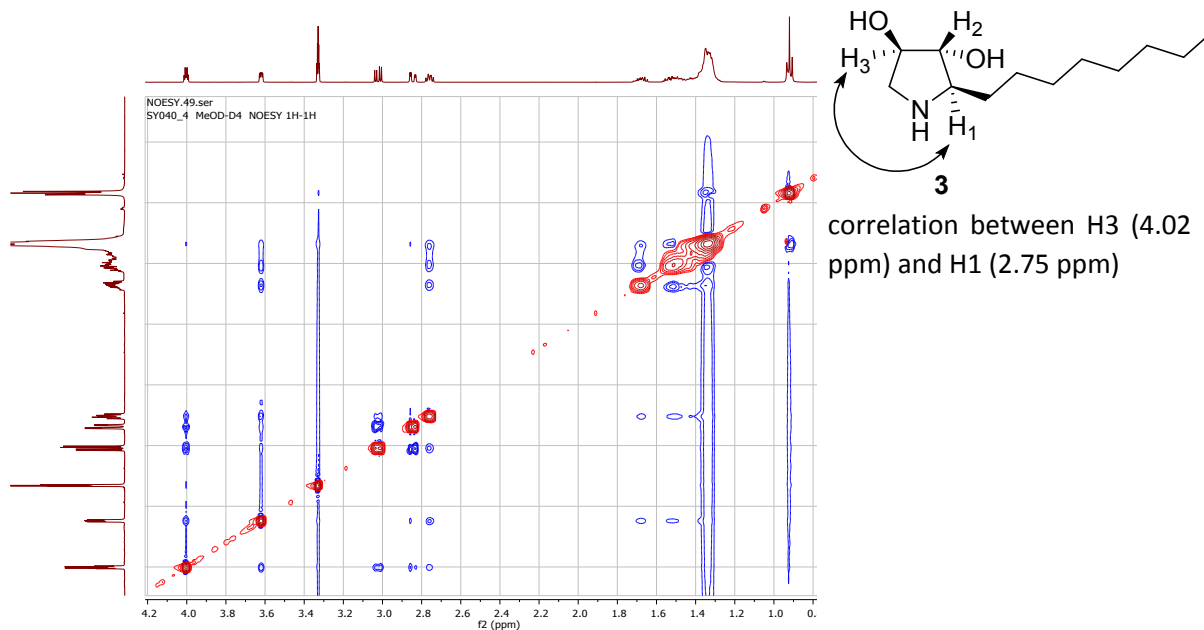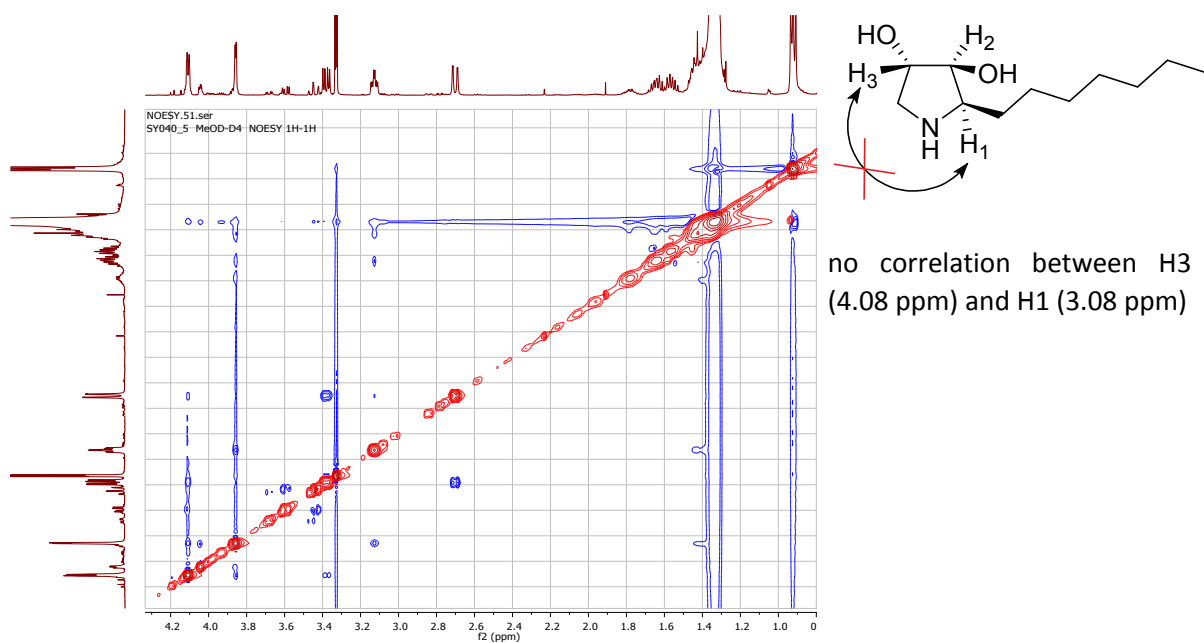

Dose-response curves for compounds 2 and *ent*-2 versus  $\beta$ -GCase

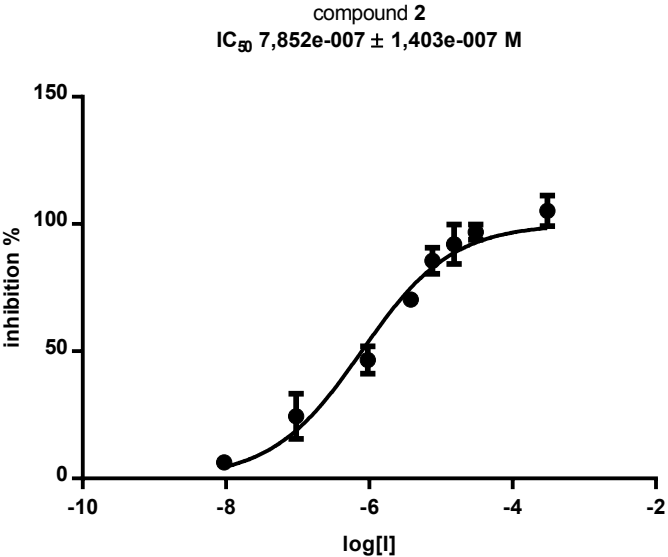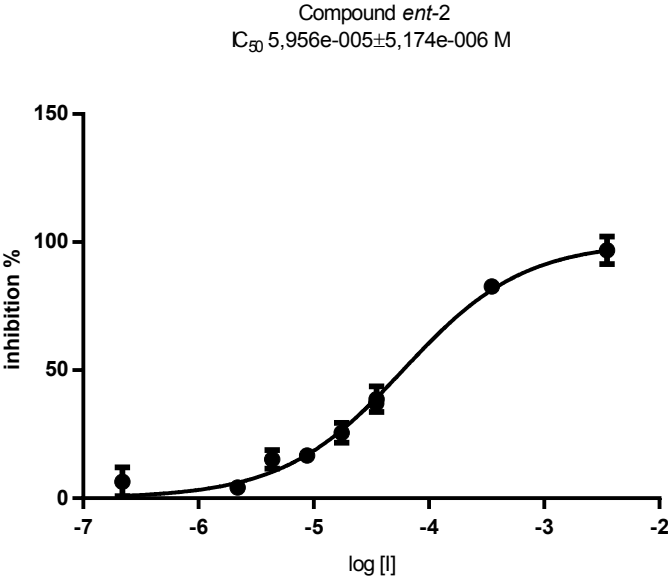

## Lineweaver-Burk plots for compounds 2 and *ent*-2 versus $\beta$ -GCase

### Compound 2

Non-competitive inhibition with  $K_i=0.40 \mu\text{M}$

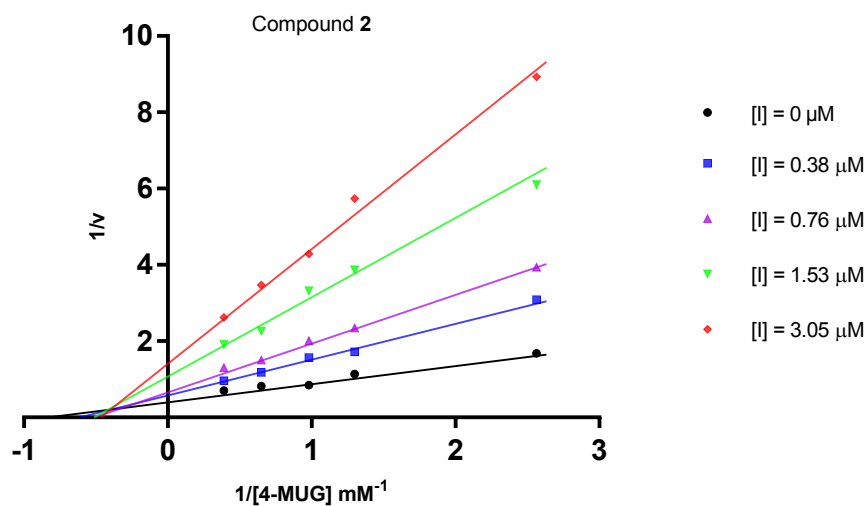

### Compound *ent*-2

Competitive inhibition with  $K_i=6.87 \mu\text{M}$

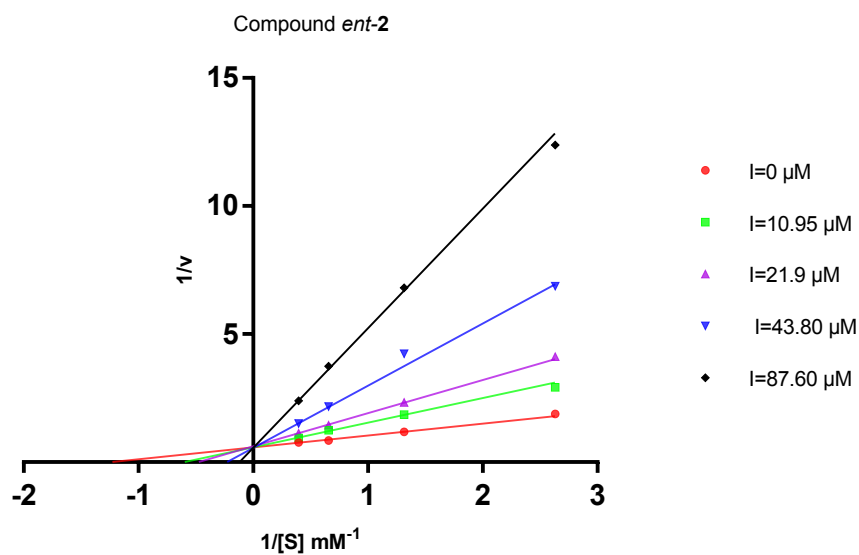



## Best poses of compound 2 obtained with GPU docking protocol

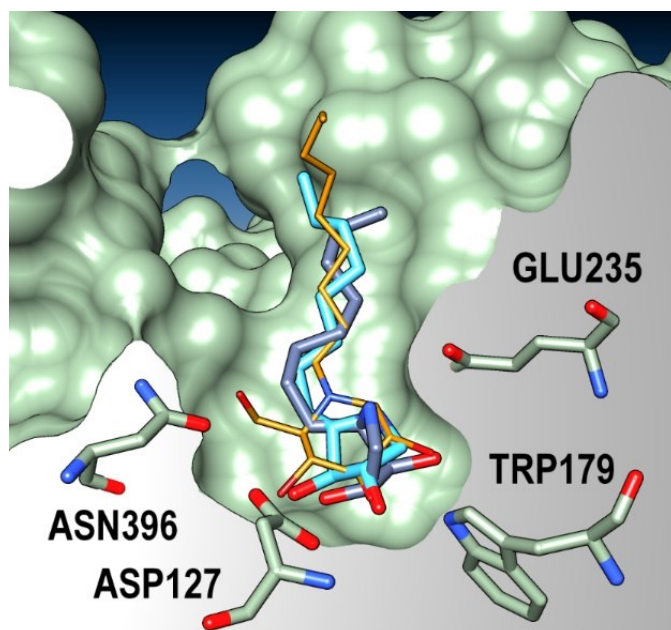

**Figure 1.** Comparison of NN-DNJ (orange) with best poses (P1-OPT docking protocol) of *ent*-2 (cyan) and 2 (dark blue) compounds showing the discrepancies of conformations of the heterocycle.

## MTT Test for compounds 2, *ent*-2, NN-DNJ, IFG at 30 $\mu$ M

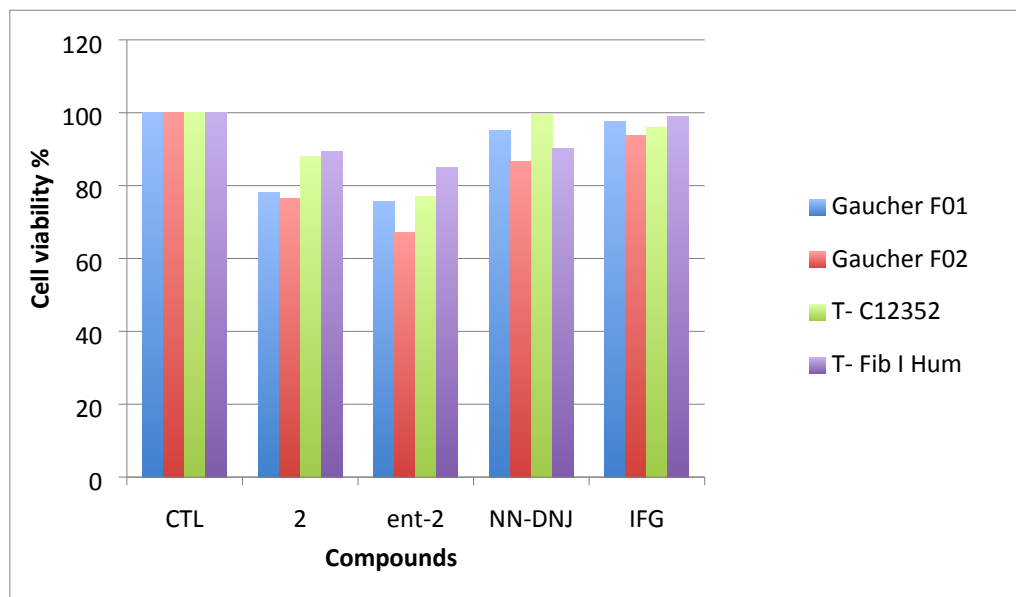

### Cultured primary skin fibroblasts from control individuals and patients affected with Gaucher

Cultured primary skin fibroblasts from control individuals and patients affected with Gaucher disease (carrying the N370S mutation) were obtained from the Laboratoire de Biochimie Métabolique, CRB, IFB, CHU Toulouse, France and CBC Biotech biobank BB-0033-00046 (3809 F01 and 1541 F02 cell lines), Hospices Civils de Lyon, France. Cells were immortalized after transfection with a plasmid encoding the SV40 large T antigen. Cells were routinely cultured in DMEM medium supplemented with 10% inactivated foetal calf serum. After incubation for 72 h in the presence of the chemical compounds or vehicle (ethanol) only, cell viability was evaluated using the MTT test as reported earlier.<sup>1</sup> Briefly, cells were plated in 24-well plates (30,000 cells/well) and at 50% confluency cells were incubated with fresh medium supplemented with 30  $\mu$ M of compounds. After 72 h, 500  $\mu$ g of MTT was added to each well. After 2 h of incubation at 37 °C, supernatants were discarded, and the remaining material was dissolved by 1 mL of DMSO. After 30 min, absorbance was measured at 560 nm by using a microplate reader. Background values were subtracted from all other values and viability was expressed as percentage compared with untreated controls.

<sup>1</sup> Wenger, D.A.; Williams, C. Techniques in Diagnostic Human Biochemical Genetics: A Laboratory Manual; Hommes, F.A., Ed.; Wiley-Liss Inc.: New York, NY, USA, 1991; pp. 587–617.
